# 1 **Habitat loss does not always entail negative genetic consequences**

2 Carolina S. Carvalho<sup>a§</sup>, Éder C. M. Lanes<sup>a§</sup>, Amanda R. Silva<sup>a,b</sup>, Cecilio F. Caldeira<sup>a</sup>, Nelson  
3 Carvalho-Filho<sup>a</sup>, Markus Gastauer<sup>a</sup>, Vera L. Imperatriz-Fonseca<sup>a</sup>, Wilson Nascimento Júnior<sup>a</sup>,  
4 Guilherme Oliveira<sup>a</sup>, José O. Siqueira<sup>a</sup>, Pedro L. Viana<sup>b</sup>, Rodolfo Jaffé<sup>a,c\*</sup>

5 <sup>a</sup> Instituto Tecnológico Vale, Rua Boaventura da Silva 955, 66055-090 Belém-PA, Brazil.

6 <sup>b</sup> Museu Paraense Emílio Goeldi, Av. Perimetral 1901, Terra Firme, 66077-530, Belém-PA,  
7 Brazil.

8 <sup>c</sup> Departamento de Ecologia, Universidade de São Paulo, Rua do Matão 321, trav 14, 05508-  
9 900 São Paulo-SP, Brazil.

10 <sup>§</sup> Both authors contributed equally

11 \* **Corresponding author:** Rodolfo Jaffé - Instituto Tecnológico Vale, Rua Boaventura da

12 Silva 955, 66055-090 Belém-PA, Brazil. Phone number: +55 (91) 3213-5523, Email:

13 [rodolfo.jaffe@itv.org](mailto:rodolfo.jaffe@itv.org)

## 14 **Abstract**

15 Although habitat loss has large, consistently negative effects on biodiversity, its genetic  
16 consequences are not yet fully understood. In this paper, we assess the genetic consequences  
17 of extreme habitat loss driven by mining in two endemic plants from Amazonian Savannas.  
18 Our analyses are the first to overcome major methodological limitations like the confounding  
19 effect of habitat fragmentation, historical processes underpinning genetic differentiation,  
20 time-lags between the onset of disturbances and genetic outcomes, and the need for large  
21 numbers of samples, genetic markers and replicated landscapes to ensure sufficient statistical  
22 power. We found that both species are remarkably resilient, as genetic diversity and gene  
23 flow patterns were unaffected by habitat loss. Our study unambiguously demonstrates that it  
24 is not possible to generalize about the genetic consequences of habitat loss, and imply that  
25 future conservation efforts need to consider species-specific genetic information.

26 In spite of ample evidence showing that habitat loss has large, consistently negative effects on  
27 biodiversity<sup>1</sup>, very few studies have assessed the consequences of habitat amount on genetic  
28 variation<sup>2</sup>. Habitat loss can potentially impact the demographics of natural populations,  
29 reducing population size, migration, gene flow and genetic diversity, and thereby increasing  
30 inbreeding and extinction risk<sup>3</sup>. Understanding the genetic consequences of habitat loss is  
31 therefore essential to safeguard biological diversity and fulfill Aichi Biodiversity Targets and  
32 Sustainable Development Goals<sup>4</sup>.

33           Important limitations constrain the quantification of habitat amount effects on  
34 genetic variation. Firstly, habitat loss and fragmentation are often confounded, so  
35 disentangling the relative contribution of habitat amount requires controlling for  
36 fragmentation<sup>1</sup>. Secondly, landscape effects can also be easily confounded with historical  
37 processes and the underlying population structure<sup>5</sup>. Thirdly, a coarse resolution of spatial  
38 data and time-lags between the onset of disturbances and genetic responses may mask the  
39 effects of recent landscape modification<sup>6,7</sup>. Finally, large numbers of samples and genetic  
40 markers, and replicated sampling designs that capture enough landscape heterogeneity are  
41 needed to detect or rule out possible landscape effects with sufficient statistical power<sup>8,9</sup>.  
42 Failure in overcoming any of these limitations may hide important detrimental effects to the  
43 maintenance of genetic variability, or reveal spurious patterns unrelated to habitat loss.

44           Few studies have attempted to quantify the impact of habitat loss on both genetic  
45 diversity and gene flow, and neither has yet accounted for all the methodological limitations  
46 outlined above<sup>2,7</sup>. Here we fill this important knowledge gap assessing the genetic  
47 consequences of extreme habitat loss driven by open-pit mining in two endemic plants from  
48 the Eastern Amazon. Firstly, we were able to assess the independent effect of habitat loss, as  
49 open-pit mining in our study region rarely involves habitat fragmentation (Supplementary

50 Figure S1). We also accounted for the underlying population structure when assessing  
51 landscape effects on genetic diversity and gene flow, assessed the sensitivity of our analyses  
52 to the resolution of spatial data, and used annual species (which complete a full reproductive  
53 cycle and die within one year) to minimize possible time-lag effects. Finally, we sampled  
54 hundreds of individuals scattered across two separate regions exposed to mining, and  
55 genotyped them at thousands of single nucleotide polymorphisms (SNPs) distributed across  
56 their genomes to assure high statistical power.

57           Our study species were *Brasilianthus carajensis* (Melastomataceae) and  
58 *Monogereion carajensis* (Asteraceae), annual herbs endemic to the Carajás Mineral Province  
59 in the Eastern Amazon (Fig. 1). Both species seem to be pollinated by insects, their seeds  
60 dispersed by the wind, and exclusively occur in the banded iron formations known as Cangas  
61 <sup>10,11</sup> which constitute inselbergs of Amazonian Savannas embedded in an evergreen forest  
62 matrix. As Cangas harbor one of the world's largest deposits of high-grade iron ore <sup>12</sup>, they  
63 have attracted substantial attention from mining companies. In fact two of the world's largest  
64 iron-ore mines are located in the region (Fig. 1), with operations in Serra Norte dating back to  
65 the 1980s, while Serra Sul only began activities in 2014. We predicted that: i) Individuals  
66 surrounded by undisturbed habitats would show higher genetic diversity and lower  
67 inbreeding than those exposed to habitat loss driven by mining; ii) Gene flow would be best  
68 explained by recent landscape modifications, and mining areas would represent barriers to  
69 gene flow.

## 70 **Results**

### 71 *Neutral dataset*

72 We collected leaf tissue samples of 150 individuals of *B. carajensis* and 207  
73 individuals of *M. carajensis* distributed across the entire occurrence range of both species and  
74 surrounding two large iron ore mines (Fig. 1). Samples were frozen and their DNA later  
75 extracted and shipped for genotyping-by-sequencing (RAD-sequencing) and bioinformatic  
76 processing. We identified a total of 10,016 SNPs in *B. carajensis* and 20,464 SNPs in *M.*  
77 *carajensis*, but after filtering these for quality, depth, linkage disequilibrium, deviations from  
78 the Hardy-Wenberg Equilibrium and  $F_{ST}$  outlier loci, we obtained sets of neutral and  
79 independent markers containing 1,411 and 6,052 loci for each species respectively.

#### 80 *Genetic structure*

81 Two complementary genetic clustering approaches used to assess population structure  
82 (Admixture<sup>13</sup> and Discriminant Analysis of Principal Components - DAPC<sup>14</sup>) indicated the  
83 presence of three clusters in *B. carajensis* and two in *M. carajensis* (Fig. 2, Supplementary  
84 Figure S2-S4). Significant albeit low inbreeding was found in one genetic cluster of each  
85 species (Fig. 2). Both species showed spatial autocorrelation in genetic relatedness in Serra  
86 Norte but not in Serra Sul, and the strength of spatial autocorrelation was higher in *B.*  
87 *carajensis* (Fig. 2).

#### 88 *Genetic diversity*

89 To assess the effect of habitat loss on genetic diversity, we regressed individual-level  
90 diversity metrics on historical habitat amount (1979) and habitat loss driven by mining in  
91 different years (2011, 2014 and 2016). Heterozygosity ( $H_E$ ) and inbreeding ( $F$ ) were not  
92 influenced by habitat loss, neither in Serra Norte nor in Serra Sul, as the set of best-fitting

93 models always included null models or historical (pre-mining) habitat amount (Fig. 3,  
94 Supplementary Table S1). Historical habitat amount was found to be associated with  
95 inbreeding in both species, although the direction of the effect varied (Fig. 4, Supplementary  
96 Table S2).

### 97 *Gene flow*

98 To assess the effect of habitat loss on gene flow, we first employed a genetic  
99 algorithm to optimize gene flow hypotheses<sup>15</sup>, then calculated effective resistance between  
100 individual samples using Circuitscape V4.0<sup>16</sup>, and finally modeled isolation by resistance  
101 (IBR) regressing pairwise genetic relatedness on resistance distances through Maximum  
102 Likelihood Population Effects (MLPE) models. Resistance to gene flow due to mining was  
103 modeled using land cover maps for different years (2016, 2014, 2011 and 1979). Additional  
104 variables found to be important predictors of gene flow in other plants<sup>17,18</sup> were modeled  
105 along with land cover, including geographic distance, terrain roughness, elevation, and  
106 bioclimatic variables. The optimization of resistance surfaces revealed that Canga was the  
107 land cover class representing lowest resistance to gene flow in both species, whereas mining  
108 areas and evergreen forests imposed higher resistance (Supplementary Figure S5-S8).  
109 However, univariate MLPE regression models revealed that geographic distance usually  
110 explained relatedness patterns as well as land cover (Supplementary Table S3), and only pre-  
111 mining land cover (1979) was found to explain relatedness patterns better than geographic  
112 distance in *M. carajensis* from Serra Norte. Our results thus reveal that mining neither  
113 hinders nor facilitates gene flow in these two endemic annual plants. While these results hold  
114 across different resolutions (Supplementary Table S3), an independent barrier analysis also  
115 failed to identify barriers between individuals separated by mining areas (Supplementary

116 Figure S9). Multiple MLPE regression models showed that isolation by geographic distance  
117 (IBD) explained genetic relatedness patterns in *B. carajensis*, whereas isolation by resistance  
118 (IBR, <sup>16</sup>) was more important in *M. carajensis* (Fig. 3, Supplementary Table S4). In all cases,  
119 genetic relatedness decreased with increasing resistance (Fig. 4, Supplementary Table S5).

## 120 *Germination experiments*

121 Germination experiments revealed that seeds from both species are able to germinate  
122 in mining waste substrates. Whereas *M. carajensis* showed similar germination in Canga and  
123 mining substrates, germination rates of *B. carajensis* were higher in Canga topsoil  
124 (Supplementary Figure S10).

## 125 **Discussion**

126 Our study is the first to assess the genetic consequences of habitat loss while  
127 accounting for all the major limitations constraining the quantification of habitat amount  
128 effects on genetic variation. Our results reveal that habitat loss driven by mining did not  
129 affect genetic diversity or gene flow in two endemic herbs from Amazonian Savannas.  
130 Whereas historical habitat amount was found to influence inbreeding; heterozygosity and  
131 inbreeding were not affected by habitat loss in either species, and gene flow was mainly  
132 influenced by geographic distance in *B. carajensis* and by pre-mining land cover and local  
133 climate in *M. carajensis*.

134 The genetic structure in *B. carajensis* mirrored that from the co-occurring perennial  
135 morning glory *Ipomoea maurandioides* <sup>17</sup>, showing two differentiated genetic clusters in  
136 Serra Norte, while *M. carajensis* only presented one cluster in Serra Norte and another one

137 across the remaining distribution range. This genetic structure was considered when assessing  
138 landscape effects on genetic diversity and gene flow, so our results were not biased by  
139 historical patterns of genetic differentiation.

140         The maintenance of genetic diversity in spite of extreme habitat loss suggests that our  
141 study plants are able to colonize mining environments and maintain gene flow across open-  
142 pit mines. Germination experiments revealed that seeds from both species can indeed  
143 germinate in mining waste substrates. Additionally, both plant species showed extensive gene  
144 flow across mining areas, and mining neither enhanced nor hindered gene flow. Similar  
145 results were found for a threatened orchid and the American pika, which showed analogous  
146 levels of genetic diversity in mining and natural habitats<sup>19,20</sup>, although neither gene flow nor  
147 historical effects were assessed. Inbreeding levels in our focus species are comparable to  
148 those observed in the widespread *I. maurandioides*<sup>17</sup>, and since they were associated with  
149 historical habitat amount they seem to reflect density-dependent selfing<sup>21</sup>.

150         Both species presented spatial autocorrelation in genetic relatedness in Serra Norte  
151 but not in Serra Sul, indicating a more restricted gene flow in the Canga archipelago of Serra  
152 Norte than in the large continuous plateau of Serra Sul. Additionally, geographic distance  
153 resistance was weakly correlated with recent land cover resistance in Serra Norte but not in  
154 Serra Sul, where it was strongly correlated with land cover resistance from all years  
155 (Supplementary Figure S11). We thus expected that isolation by resistance (IBR) would be  
156 easier to disentangle from isolation by distance (IBD) in Serra Norte than in Serra Sul. In  
157 Serra Norte, however, geographic distance and pre-mining land cover (highly correlated with  
158 geographic distance) were the best predictors of current gene flow in *B. carajensis* and *M.*  
159 *carajensis* populations, respectively. Considering the strong winds characterizing Montane  
160 Savanna ecosystems from the Carajás Mineral Province<sup>12</sup>, and the fact that wind currents in  
161 open landscapes are known to facilitate long-distance dispersal of plant propagules<sup>22,23</sup>, we



162 posit that wind-mediated dispersal is driving gene flow across Montane Savannas and open-  
163 pit mines. On the other hand, local climate differences also appear to explain gene flow  
164 patterns in *M. carajensis* populations from Serra Sul better than IBD, suggesting mismatches  
165 in flowering periods <sup>24</sup>. We nevertheless caution that our study design and the little available  
166 knowledge on the natural history of these plants do not allow disentangling the relative  
167 contribution of pollen and seed dispersal on gene flow.

168         The absence of an effect of habitat loss on genetic variation can be attributed to time-  
169 lags between the onset of disturbances and genetic responses <sup>25</sup>. We overcame this  
170 methodological limitation by focusing on species with a short generation time (i.e.  
171 completing their life cycle within one year), and by explicitly incorporating time scale into  
172 our analyses (evaluating land cover maps from different years). Moreover, our isolation by  
173 resistance models primarily reflect recent gene flow, as they explicitly account for the  
174 underlying population structure and rely on relatedness estimates calculated from thousands  
175 of independent and neutral SNPs. Mining operations began in the 1980s in Serra Norte,  
176 allowing enough time (~40 generations) to assess genetic responses to mining. On the other  
177 hand, Serra Sul was still pristine by 2013, so only three plant generations were exposed to  
178 mining before our samples were collected in 2017. This could explain why geographic  
179 distance explained relatedness patterns in Serra Sul better than land cover (Supplementary  
180 Table S3). However, land cover did not explain relatedness patterns in either species in Serra  
181 Norte, which clearly shows that gene flow has been maintained across mines. In contrast,  
182 land cover in existence two decades ago was found to explain gene flow in a perennial  
183 narrow endemic morning glory occurring in Serra Norte <sup>17</sup>, indicating that our methods  
184 should be sufficient to detect an effect of mining should there be one. Additionally, our  
185 findings were unaffected by the resolution of spatial data and were supported by an

186 independent barrier analysis, so they clearly reveal that gene flow in our two annual herbs is  
187 unaffected by habitat loss driven by mining.

## 188 *Conclusions*

189       Using thousands of genetic markers to study two annual endemic plants in replicated  
190 landscapes, we found that extreme habitat loss driven by mining did not result in any  
191 detectable genetic consequences. Since our results are not biased by the effect of habitat  
192 fragmentation, the underlying genetic structure of plant populations, the resolution of spatial  
193 data, nor time-lag effects, they unambiguously reveal that habitat loss does not always entail  
194 negative genetic consequences. For instance, our study reveals remarkably resilient species to  
195 extreme habitat loss. These findings imply that it is not possible to generalize about the  
196 genetic consequences of habitat loss, so future conservation efforts need to consider species  
197 individually.

## 198 **Materials and Methods**

### 199 *Sampling, DNA extraction, and genome size estimation*

200       We collected leaf tissue samples of 150 individuals of *B. carajensis* and 207  
201 individuals of *M. carajensis* between February and June 2017 (SISBIO collection permit N.  
202 48272-4). Samples were collected in the main Canga plateaus of our study area, comprising  
203 the entire occurrence range of both species, and care was taken to sample individuals at or  
204 around iron ore mines (Fig. 1). To ensure high DNA quality and concentration, we preserved  
205 *B. carajensis* samples in silica and *M. carajensis* samples in 10 mL of a NaCl-saturated  
206 solution of 2% CTAB<sup>26</sup>, and stored them at -80 °C until analysis. Total DNA of *B. carajensis*  
207 was extracted using a CTAB 2% protocol<sup>27</sup> followed by a DNA purification protocol<sup>28</sup>;

208 whereas the DNeasy Plant Mini Kit (Qiagen, EUA) was used for *M. carajensis*. DNA  
209 concentration for both species was quantified using the Qubit High Sensitivity Assay kit  
210 (Invitrogen), and DNA integrity assessed through 1.2% agarose gel electrophoresis. All DNA  
211 samples were adjusted to a final concentration of 5 ng/μL in a final volume of 30 μL. We  
212 used flow cytometry to estimate genome size in both species. Nuclei were obtained from  
213 fresh leaf tissues chopped along with references in general purpose buffer with 1% Triton X-  
214 100 and 1% PVP-30<sup>29</sup>. The whole sample preparation was conducted on ice until the events  
215 acquisition on a PI fluorescence mean under a 575/26 bandpass filter. Triplicates of 1000 PI  
216 stained nuclei were analyzed under a 488 nm laser on BD FACS Aria II cytometer. The  
217 internal standard used was tomato (*Lycopersicon esculentum*; 2C = 1.98 pg,<sup>30</sup>).

#### 218 *RAD sequencing and SNP discovery*

219 DNA samples were shipped to SNPSaurus (<http://snpsaurus.com/>) for sequencing and  
220 bioinformatic analyses. Briefly, nextRAD genotyping-by-sequencing libraries were prepared  
221<sup>31</sup> using Nextera reagent (Illumina, Inc) and considering the estimated genome size of each  
222 species (2C DNA content was 508 Mbp in *B. carajensis* and 6,284 Mbp in *M. carajensis*).  
223 The nextRAD libraries were then sequenced on an Illumina HiSeq 4000 (University of  
224 Oregon). Reads were trimmed using *BBMap tools* (<http://sourceforge.net/projects/bbmap/>)  
225 and a *de novo* reference was created by collecting 10 million reads evenly from the samples,  
226 excluding reads that had counts fewer than 5 or more than 700 for *B. carajensis*; and fewer  
227 than 6 or more than 1,000 for *M. carajensis*. The remaining loci were then aligned to each  
228 other to identify alleles. All reads were mapped to the reference with an alignment identity  
229 threshold of 90% using *BBMap*, generating 150bp contigs. Genotype calling was done using  
230 *Samtools* and *bcftools* (<https://github.com/samtools/samtools>), and the resulting set of

231 genotypes were filtered to remove loci with a minor allele frequency of less than 3%.  
232 Heterozygous loci or loci that contained more than 2 alleles in a sample (suggesting collapsed  
233 paralogs) were removed. The absence of artifacts was checked by counting SNPs at each read  
234 nucleotide position and determining that SNP number did not increase with reduced base  
235 quality at the end of the read. A total of 43,887 contigs were generated for *B. carajensis*  
236 (sequencing depth ranged between 18 and 239), and 36,040 for *M. carajensis* (depth ranging  
237 between 14 and 246).

### 238 *Neutral datasets*

239 The R package *r2vcftools* (<https://github.com/nspope/r2vcftools>) - a wrapper for  
240 VCFtools<sup>32</sup> - was used to perform final quality control on the genotype data. We filtered loci  
241 for quality (Phred score > 50 both species), read depth (30 – 240 both species), linkage  
242 disequilibrium (LD,  $r^2 < 0.6$  and  $r^2 < 0.4$  for *B. carajensis* and *M. carajensis*, respectively),  
243 and strong deviations from the Hardy Weinberg Equilibrium (HWE,  $p < 0.0001$  both species).  
244 Additionally, we removed any potential loci under selection detected through genome scans,  
245 whereby  $F_{ST}$  outlier tests were applied after adjusting false discovery rates ( $q = 0.05$ )  
246 according to the distribution of  $p$ -values<sup>33</sup>. The resulting sets of neutral and independent loci  
247 were then used in all subsequent analyses.

### 248 *Genetic structure*

249 We used two complementary genetic clustering software to assess population  
250 structure: Admixture<sup>13</sup> and DAPC from the *adegenet* package<sup>14,34</sup>. For the former analysis,  
251 the number of ancestral populations ( $k$ ) was allowed to vary between 1 and 10, and the best  $k$

252 was chosen based on cross-validation errors <sup>35</sup>. For the second analyses, the number of  
253 clusters was assessed using the function “*find.cluster*”, which runs successive *k*-means  
254 clustering with an increasing number of clusters, and then determined the best-supported  
255 number of genetic clusters using the Bayesian Information Criterion (BIC). Considering the  
256 ancestry coefficients assigned by Admixture, we then estimated expected heterozygosity ( $H_E$ )  
257 and inbreeding coefficients ( $F$ ) for each genetic cluster. Additionally, we assessed fine-scale  
258 spatial genetic structure within each genetic cluster by quantifying spatial autocorrelation in  
259 Yang’s genetic relatedness between pairs of individuals <sup>36</sup>. To do so we used local polynomial  
260 fitting (LOESS) of pairwise relatedness and pairwise geographic distance ([https://github.com/](https://github.com/rojaff/Lplot)  
261 [rojaff/Lplot](https://github.com/rojaff/Lplot)).

## 262 *Land cover maps*

263 To account for time-lag effects when assessing the genetic consequences of habitat  
264 loss, we built land cover maps for different years (2016, 2014, 2011 and 1979), comprising  
265 pre-mining maps (1979). *Landsat* images (spatial resolution of 30 meters in 7 spectral bands)  
266 were used for years 1979 and 2011, while 2014 and 2016 maps were generated using *Sentinel*  
267 images (spatial resolution of 10 meters in 4 spectral bands). Images were downloaded from  
268 the Earth Explorer Server (<https://earthexplorer.usgs.gov/>), selecting scenes from the month  
269 of July to minimize clouds. All images were converted to ground reflectance in percentage  
270 using the ATCOR algorithm of the PCI Geomatica 2016 software. The scenes were joined to  
271 create a mosaic of the study area and derive the Normalized Difference Vegetation Index -  
272 NDVI <sup>37</sup>. We then employed the eCognition 9 software using a Geographic Object-Based  
273 Image Analysis (GEOBIA) to classify land cover types. The Multi-resolution classification  
274 algorithm was selected, given that it allows obtaining segments with different sizes due to

275 brightness, shape, smoothness and compactness. Montane Savanna (Canga), Water, Forest,  
276 Mine, Pastureland and Urban classes were identified.

### 277 *Genetic diversity*

278 To assess the effect of habitat loss on genetic diversity, we regressed individual-level  
279 diversity metrics ( $H_E$  and  $F$ ) on historical habitat amount and habitat loss driven by mining in  
280 different years (2011, 2014 and 2016) using high resolution land cover maps (10 x 10m). By  
281 so doing we explicitly evaluated the effect of habitat loss accounting for historical habitat  
282 amount. Historical habitat amount was calculated by extracting the proportion of Canga  
283 habitat in a buffer surrounding each individual using pre-mining maps (1979). Habitat loss in  
284 different years was calculated by subtracting habitat amount for a given year from historical  
285 habitat amount. To select an optimal buffer size we first ran uni-variate models using habitat  
286 amount extracted from the most recent land cover maps (2016) with buffers varying in size  
287 between 100 and 900m, and then compared all models using AIC. As habitat amount  
288 calculated with the largest buffers (900m) was always among the best models ( $\Delta AIC \leq 2$ ), we  
289 chose this buffer size to encompass a greater portion of lost areas (Supplementary Table S6).

290 In Serra Norte, which comprises an archipelago of Canga plateaus, we fit linear  
291 mixed-effect models, using each plateau as a random effect to account for site-specific  
292 characteristics and spatial autocorrelation. In the case of *B. carajensis* from Serra Norte, we  
293 also included a random effect specifying the genetic cluster containing each individual (see  
294 genetic structure results). In Serra Sul, which comprises a single large plateau, we used  
295 generalized least-squares models (GLS) fitted with different correlation structures (linear,  
296 exponential, Gaussian, and spherical) to explicitly model spatial autocorrelation. The  
297 “*weight*” argument was used in some cases to account for heteroscedasticity. Raw  $F$  and

298 logit-transformed  $H_E$  were used as response variables and models fitted using the *nmle* R  
299 package<sup>38</sup>. The set of best models ( $\Delta AIC \leq 2$ ) were compared to reduced models without  
300 each predictor variables using likelihood ratio tests (LRT,  $\alpha = 0.05$ ) and all models were  
301 validated by plotting residual vs. fitted values and by checking for residual autocorrelation.  
302 Relative variable importance was calculated dividing the sum of Akaike weights by the  
303 number of models containing each predictor variable from those included in set of best-fitting  
304 models. Model averaging across the set of best models was used to compute parameters  
305 estimates that account for uncertainty in model selection<sup>39</sup>.

### 306 *Gene flow*

307 To assess the effect of habitat loss on gene flow, we employed a genetic algorithm to  
308 optimize gene flow hypotheses and then tested them by modeling isolation by resistance  
309 (IBR,<sup>16</sup>). Yang's genetic relatedness between pairs of individuals<sup>36</sup> was used as a proxy for  
310 gene flow, as it was developed for SNP markers and similar measures of relatedness have  
311 proven highly accurate individual-based genetic distance metrics in landscape genetic studies  
312<sup>40</sup>. Resistance to gene flow due to mining was modeled using land cover maps for different  
313 years (2016, 2014, 2011 and 1979) containing only the major land cover classes of our study  
314 region: Montane Savanna (Canga), Forest (evergreen forest) and Mine. Water bodies,  
315 Pastureland and Urban areas were excluded because they occurred outside the extent of our  
316 samples (Fig. 1). By so doing we were able to evaluate the permeability to gene flow of each  
317 land cover class; and test whether habitat loss driven by mining hindered gene flow across  
318 our replicated landscapes. Additional variables found to be important predictors of gene flow  
319 in other plants<sup>17,18</sup> were modeled along with land cover, including geographic distance,  
320 elevation (DEM retrieved from the USGS Earth Explorer), terrain roughness (generated from

321 the DEM using the Terrain Analysis plug-in from QGIS), and bioclimatic variables (retrieved  
322 from WorldClim). To select a set of orthogonal variables explaining most climatic variation  
323 across our study area, we first ran separate principal component analyses (PCA) for each  
324 species using the extracted values from all 19 WorldClim bioclimatic layers plus elevation  
325 (scaled). We then selected the three variables showing the strongest correlation with the first,  
326 second and third PCA axis (which explained more than 85% of total variance in both *B.*  
327 *carajensis* and *M. carajensis*). These were minimum temperature of coldest month (bio06)  
328 and precipitation of wettest (bio16) and coldest quarter (bio19) for *B. carajensis*; and  
329 minimum temperature of coldest month (bio06), precipitation of wettest quarter (bio16) and  
330 temperature seasonality (bio04) for *M. carajensis*.

331 A genetic algorithm implemented through the *ResistanceGA* package was used to  
332 generate optimized resistance surfaces for each one of these variables <sup>15</sup>. In the case of land  
333 cover maps, random initial resistance values were assigned for each class; then pairwise  
334 effective distances were measured using random-walk commute times; and finally pairwise  
335 genetic distance was regressed on effective distance using maximum likelihood population  
336 effect models (MLPE, see below). The whole process was iterated until no significant change  
337 was found in the objective function <sup>15</sup>. We then performed the same steps for the remaining  
338 continuous predictors, but instead of assigning random initial resistance values, eight types of  
339 transformations were applied to the raw values. In this case, two parameters controlling  
340 Ricker and Monomolecular functions were iteratively varied during the optimization <sup>15</sup>. Ten  
341 independent runs of optimization were conducted for each surface to assess the convergence  
342 in parameter estimates <sup>41</sup>. All rasters were set to Universal Transverse Mercator (UTM)  
343 projection, and cropped to the extent of sampling locations plus a buffer area of 5 km to  
344 minimize border effects <sup>17</sup>. Land cover resistance surfaces and terrain roughness were



345 optimized using 250 x 250 m resolution maps, while 900 x 900 m resolution maps were used  
346 for WorldClim layers as this is the highest available. Serra Norte and Serra Sul were analyzed  
347 separately aiming to replicate IBR analyses in two separate areas exposed to open-pit mining.

348 Using the program Circuitscape V4.0<sup>16</sup>, we then calculated pairwise resistance  
349 distances between all samples, employing the optimized resistance surfaces described above  
350 plus a surface where all pixels were set to 1 to assess isolation by geographic distance (IBD).  
351 To assess isolation by resistance (IBR), defined as the correlation between genetic and  
352 resistance distances<sup>16</sup>, we fitted mixed-effects regression models using penalized least  
353 squares and a correlation structure designed to account for the non-independence of pairwise  
354 distances (maximum-likelihood population effects - MLPE:

355 <https://github.com/nspope/corMLPE>; <sup>42</sup>). Yang's genetic relatedness between individuals was  
356 used as the response variable and the different resistance distances (contemporary and  
357 historical land cover, elevation, terrain roughness, temperature, precipitation, and geographic  
358 distance) as predictors. All MLPE models accounted for the underlying population structure,  
359 either by considering only individuals belonging to the same genetic cluster (most cases), or  
360 by including an additional random effect specifying if pairwise distances represented  
361 individuals from the same or from different genetic clusters (the case of *B. carajensis* from  
362 Serra Norte, see genetic structure results). To evaluate the incidence of time-lag effects  
363 potentially masking mining effects on gene flow, we first fitted uni-variate models for each  
364 species and region using resistance distances from land cover surfaces from all years, plus  
365 those from geographic distance surfaces. The best models were selected using the Akaike  
366 Information Criterion ( $\Delta AIC < 2$ ), and whenever geographic distance was found among the  
367 best models we considered IBD as the most parsimonious gene flow model. To evaluate the  
368 sensitivity of our analysis to the resolution (grain size) of spatial data, we also compared uni-

369 variate land cover models containing resistance distances computed from surfaces with  
370 different grain sizes (100 x 100 m, 300 x 300 m, 600 x 600 m and 900 x 900 m). Results were  
371 consistent across the different resolutions (Supplementary Table S3), so we ran all subsequent  
372 analysis using a grain size of 900 x 900 m. We then fitted multiple regression models  
373 containing resistance distances from the best uni-variate land cover models selected in the  
374 previous step and resistance distance from all other optimized surfaces for each species and  
375 region. Models containing all possible combinations of non-collinear predictors ( $r < 0.6$ ,  
376 Supplementary Figure S11) were compared using the *dredge* function from the package  
377 *MuMIn* ([https://github.com/rojaff/dredge\\_mc](https://github.com/rojaff/dredge_mc); <sup>43</sup>), and best models were selected using AIC.  
378 Likelihood ratio tests (LRT) were performed to assess the influence of each predictor variable  
379 on the best model's log-likelihood <sup>44</sup>, and relative variable importance and model-averaging  
380 were calculated as described above. Finally, we carried out a barrier analysis to identify  
381 genetic discontinuities between individuals by using Monmonier's algorithm and Gabriel's  
382 graph implemented in package *adegenet* <sup>34</sup>.

### 383 *Germination experiments*

384 To evaluate if seeds from both study species are able to germinate inside iron ore  
385 mines, we ran a set of germination experiments. Seeds from both species were sown over  
386 four different substrates (Whatman® paper, Canga topsoil, forest topsoil, and mining waste  
387 substrate) placed in plastic boxes (Gerbox – 11 x 11 x 4 cm) and kept in a growth chamber  
388 (Fitotron SGC 120, Weiss Technik, UK) under continuous darkness, constant temperature  
389 (20°C) and air humidity (60%) for 33 consecutive days, from September 4th to October 7th  
390 2018. Substrates received distilled water until the retention capacity, and water losses by  
391 evaporation were replaced daily. All treatments were carried out with five replicates for each

392 substrate in each species. Each replicate contained 25 seeds from *B. carajensis* and 12 seeds  
393 from *M. carajensis*. The number of germinated seeds was recorded daily, with germination  
394 defined as the emission of 2 mm of primary root.

#### 395 *Data availability*

396 Genotype data will be deposited in figshare and url addresses provided upon the acceptance  
397 of this manuscript.

#### 398 *Code availability*

399 Custom code has been deposited in GitHub and is cited in the text.

## 400 **References**

- 401 1. Fahrig, L. Effects of habitat fragmentation on biodiversity. *Annu. Rev. Ecol. Evol. Syst.*  
402 **34**, 487–515 (2003).
- 403 2. DiLeo, M. F. & Wagner, H. H. A landscape ecologist’s agenda for landscape genetics.  
404 *Curr. Landsc. Ecol. Reports* **1**, 115–126 (2016).
- 405 3. Allendorf, F. W., Luikart, G. H. & Atiken, S. N. *Conservation and the genetics of*  
406 *populations*. (Wiley-Blackwell, 2013).
- 407 4. Tittensor, D. P. *et al.* A mid-term analysis of progress toward international biodiversity  
408 targets. *Science (80-. )*. **346**, 241–244 (2014).
- 409 5. Llorens, T. M., Ayre, D. J. & Whelan, R. J. Anthropogenic fragmentation may not alter  
410 pre-existing patterns of genetic diversity and differentiation in perennial shrubs. *Mol.*  
411 *Ecol.* **27**, 1541–1555 (2018).
- 412 6. Anderson, C. D. *et al.* Considering spatial and temporal scale in landscape-genetic  
413 studies of gene flow. *Mol. Ecol.* **19**, 3565–3575 (2010).
- 414 7. *Landscape Genetics: Concepts, Methods, Applications*. (John Wiley & Sons, 2016).

- 415 8. Storfer, A., Murphy, M. A., Spear, S. F., Holderegger, R. & Waits, L. P. Landscape  
416 genetics: where are we now? *Mol. Ecol.* **19**, 3496–3514 (2010).
- 417 9. McCartney-Melstad, E., Vu, J. K. & Shaffer, H. B. Genomic data recover previously  
418 undetectable fragmentation effects in an endangered amphibian. *Mol. Ecol.* **27**, 4430–  
419 4443 (2018).
- 420 10. Rocha, K. C. de J., Goldenberg, R., Meirelles, J. & Viana, P. L. Flora das cangas da  
421 Serra dos Carajás, Pará, Brasil: Melastomataceae. *Rodriguesia* **68**, 997–1034 (2017).
- 422 11. Cruz, A. P. O., Viana, P. L. & Santos, J. U. Flora das cangas da Serra dos Carajás, Pará,  
423 Brasil: Asteraceae. *Rodriguesia* **67**, 1211–1242 (2016).
- 424 12. Skiryicz, A. *et al.* Canga biodiversity, a matter of mining. *Front. Plant Sci.* **5**, 653  
425 (2014).
- 426 13. Alexander, D. H., Novembre, J. & Lange, K. Fast model-based estimation of ancestry  
427 in unrelated individuals. *Genome Res.* **19**, 1655–1664 (2009).
- 428 14. Jombart, T., Devillard, S. & Balloux, F. Discriminant analysis of principal components:  
429 a new method for the analysis of genetically structured populations. *BMC Genet.* **11**,  
430 94 (2010).
- 431 15. Peterman, W. E. ResistanceGA : An R package for the optimization of resistance  
432 surfaces using genetic algorithms. *Methods Ecol. Evol.* **9**, 1638–1647 (2018).
- 433 16. McRae, B. H. Isolation by Resistance. *Evolution (N. Y.)*. **60**, 1551 (2006).
- 434 17. Lanes, É. C. *et al.* Landscape genomic conservation assessment of a narrow-endemic  
435 and a widespread morning glory from Amazonian Savannas. *Front. Plant Sci.* **9**, 532  
436 (2018).
- 437 18. Dyer, R. J. Landscapes and Plant Population Genetics. in *Landscape Genetics:  
438 Concepts, Methods, Applications* (eds. Balkenhol, N., Cushman, S., Storfer, A. &  
439 Waits, L.) 181–198 (Wiley Online Library, 2016).
- 440 19. Esfeld, K. *et al.* Molecular data indicate multiple independent colonizations of former  
441 lignite mining areas in Eastern Germany by *Epipactis palustris* (Orchidaceae).  
442 *Biodivers. Conserv.* **17**, 2441–2453 (2008).
- 443 20. Waterhouse, M. D., Blair, C., Larsen, K. W. & Russello, M. A. Genetic variation and  
444 fine-scale population structure in American pikas across a human-modified landscape.  
445 *Conserv. Genet.* **18**, 825–835 (2017).
- 446 21. Leimu, R., Mutikainen, P., Koricheva, J. & Fischer, M. How general are positive  
447 relationships between plant population size, fitness and genetic variation? *J. Ecol.* **94**,  
448 942–952 (2006).

- 449 22. Soons, M. B., Heil, G. W., Nathan, R. & Katul, G. G. Determinants of long-distance  
450 seed dispersal by wind in grasslands. *Ecology* **85**, 3056–3068 (2004).
- 451 23. Heydel, F., Cunze, S., Bernhardt-Römermann, M. & Tackenberg, O. Long-distance  
452 seed dispersal by wind: disentangling the effects of species traits, vegetation types,  
453 vertical turbulence and wind speed. *Ecol. Res.* **29**, 641–651 (2014).
- 454 24. Dick, C. W., Hardy, O. J., Jones, F. A. & Petit, R. J. Spatial scales of pollen and seed-  
455 mediated gene flow in tropical rain forest trees. *Trop. Plant Biol.* **1**, 20–33 (2008).
- 456 25. Schlaepfer, D. R., Braschler, B., Rusterholz, H.-P. & Baur, B. Genetic effects of  
457 anthropogenic habitat fragmentation on remnant animal and plant populations: a meta-  
458 analysis. *Ecosphere* **9**, e02488 (2018).
- 459 26. Rogstad, S. H. Saturated NaCl-CTAB solution as a means of field preservation of  
460 leaves for DNA analyses. *Taxon* **41**, 701 (1992).
- 461 27. Doyle, J. & Doyle, J. L. Genomic plant DNA preparation from fresh tissue-CTAB  
462 method. *Phytochem Bull* **19**, 11–15 (1987).
- 463 28. Michaels, S. D., John, M. C. & Amasino, R. M. Removal of polysaccharides from  
464 plant DNA by ethanol precipitation. *Biotechniques* **17**, 274–276 (1994).
- 465 29. Loureiro, J., Rodriguez, E., Dolezel, J. & Santos, C. Two new nuclear isolation buffers  
466 for plant DNA flow cytometry: A test with 37 species. *Ann. Bot.* **100**, 875–888 (2007).
- 467 30. Dolezel, J., Sgorbati, S. & Lucretti, S. Comparison of three DNA fluorochromes for  
468 flow cytometric estimation of nuclear DNA content in plants. *Physiol. Plant.* **85**, 625–  
469 631 (1992).
- 470 31. Russello, M. A., Waterhouse, M. D., Etter, P. D. & Johnson, E. A. From promise to  
471 practice: pairing non-invasive sampling with genomics in conservation. *PeerJ* **3**, e1106  
472 (2015).
- 473 32. Danecek, P. *et al.* The variant call format and VCFtools. *Bioinformatics* **27**, 2156–2158  
474 (2011).
- 475 33. François, O., Martins, H., Caye, K. & Schoville, S. D. Controlling false discoveries in  
476 genome scans for selection. *Mol. Ecol.* **25**, 454–469 (2016).
- 477 34. Jombart, T. & Ahmed, I. adegenet 1.3-1: new tools for the analysis of genome-wide  
478 SNP data. *Bioinformatics* **27**, 3070–3071 (2011).
- 479 35. Frichot, E., Mathieu, F., Trouillon, T., Bouchard, G. & François, O. Fast and efficient  
480 estimation of individual ancestry coefficients. *Genetics* **196**, 973–983 (2014).
- 481 36. Yang, J. *et al.* Common SNPs explain a large proportion of the heritability for human  
482 height. *Nat. Genet.* **42**, 565–569 (2010).

- 483 37. Tarpley, J. D., Schneider, S. R. & Money, R. L. Global vegetation indices from the  
484 NOAA-7 meteorological satellite. *J. Clim. Appl. Meteorol.* **23**, 491–494 (1984).
- 485 38. Pinheiro, J., Bates, D., DebRoy, S. & Sarkar, D. Linear and nonlinear mixed effects  
486 models. *R Packag. version* (2009).
- 487 39. Burnham, K. K. P. & Anderson, D. R. D. *Model selection and multimodel inference: a  
488 practical information-theoretic approach (2nd ed)*. Springer **172**, (2002).
- 489 40. Shirk, A. J., Landguth, E. L. & Cushman, S. A. A comparison of individual-based  
490 genetic distance metrics for landscape genetics. *Mol. Ecol. Resour.* **17**, 1308–1317  
491 (2017).
- 492 41. Khimoun, A. *et al.* Landscape genetic analyses reveal fine-scale effects of forest  
493 fragmentation in an insular tropical bird. *Mol. Ecol.* **26**, 4906–4919 (2017).
- 494 42. Clarke, R. T., Rothery, P. & Raybould, A. F. Confidence limits for regression  
495 relationships between distance matrices: Estimating gene flow with distance. *J. Agric.  
496 Biol. Environ. Stat.* **7**, 361–372 (2002).
- 497 43. Barton, K. & Barton, M. K. Package ‘MuMIn’ Version 1. (2015).
- 498 44. Jaffé, R. *et al.* Beekeeping practices and geographic distance, not land use, drive gene  
499 flow across tropical bees. *Mol. Ecol.* **25**, 5345–5358 (2016).

## 500 **Acknowledgments**

501 Funding was provided by Instituto Tecnológico Vale, National Council for Scientific and  
502 Technological Development (CNPq) grants 301616/2017-5 (RJ), 307479/2016-1, and  
503 402756/2018-5 (GO) and 300714/2017-3 (EL), and Coordenação de Aperfeiçoamento de  
504 Pessoal de Nível Superior (CAPES) grant 88887.156652/2017-00 (CSC). We thank  
505 Alexandre Castilho, Cesar Neto and Waléria Monteiro for assistance in the field, Gleiciane  
506 Salvador and Manoel Lopes for help in the laboratory, and Prof. Ing. Jaroslav Dolezel for  
507 providing the standards used in flow cytometry analyses.

## 508 **Author contributions**

509 RJ conceived, designed and coordinated the project. RJ and PLV coordinated the field work  
510 and sampling. ECML, ARS, CFC and MG performed laboratory work. RJ, ECML, CSC,  
511 ARS and CFC performed the data analysis. The first draft of the paper was written by CSC  
512 and ECML with input from RJ. All authors contributed to discussing the results and editing  
513 the paper.

#### 514 **Competing interests**

515 The authors declare no competing interests.

## 516 Figure legends

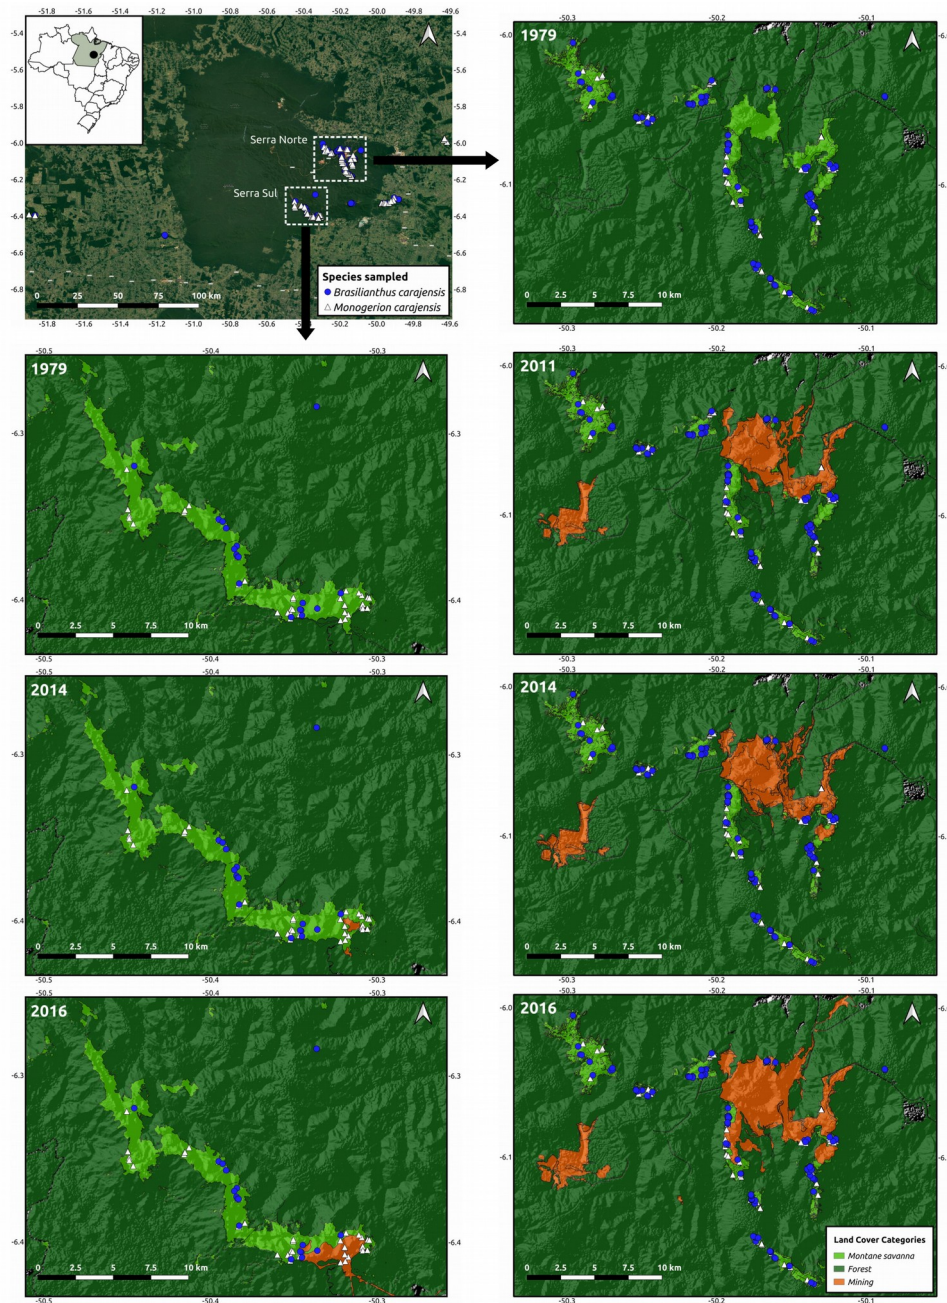

517 **Fig. 1.** Map of the study region depicting the location of the collected samples from  
518 *Brazilianthus carajensis* (blue circles) and *Monogereion carajensis* (white triangles) in Serra  
519 Norte (right panels) and Serra Sul (left panels). Hill shade maps are shown overlaid with land  
520 cover color maps for the different years analyzed. The location of the Carajás Mineral  
521 Province within Brazil is shown on the upper left corner.



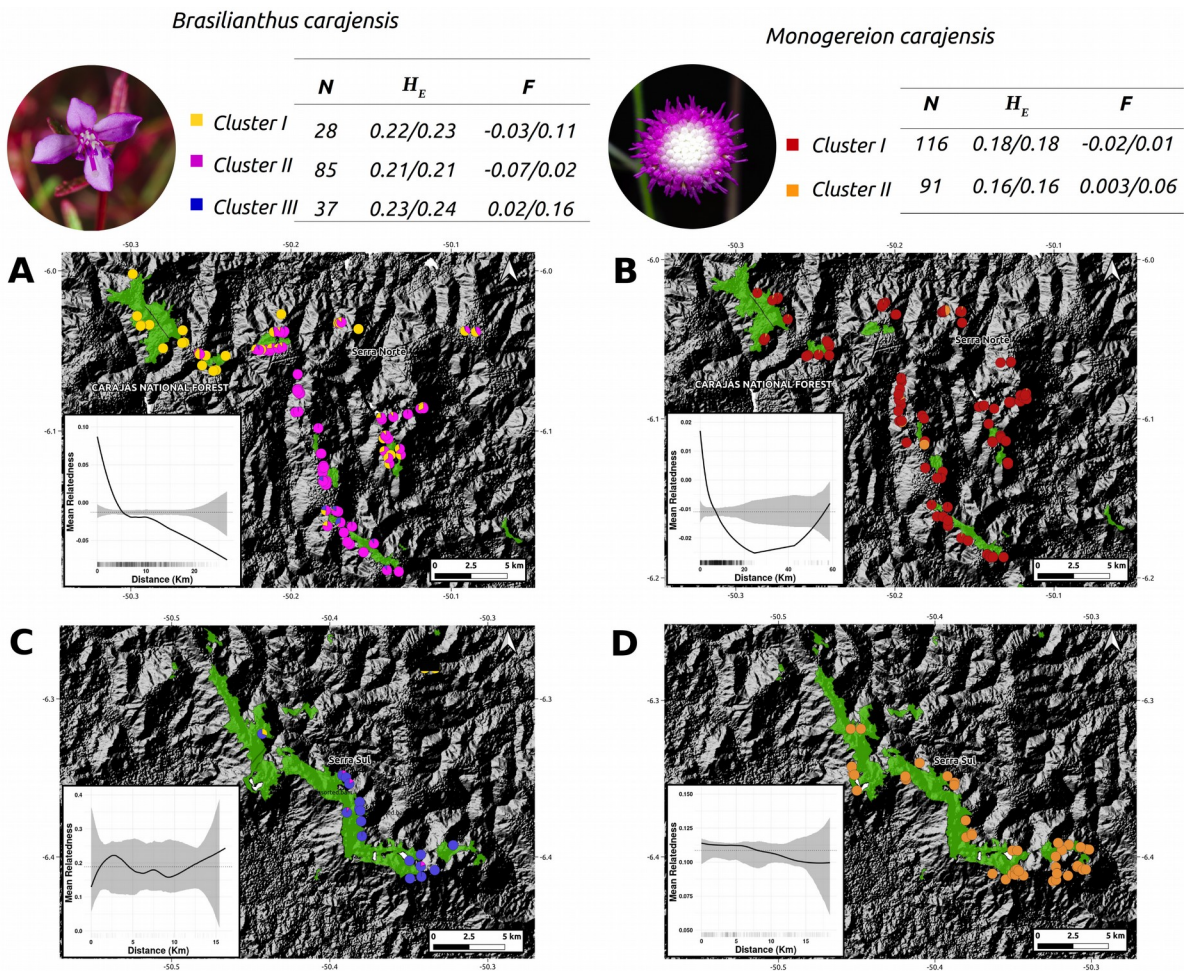

522 **Fig. 2.** Map showing the ancestry coefficients from *Brasilianthus carajensis* (A and C) and  
 523 *Monogereion carajensis* (B and D) in Serra Norte (upper panels) and Serra Sul (lower panels)  
 524 determined using the Admixture software. Montane Savanna areas are shown in green against  
 525 hill shade layers. Smaller lower-left corner plots show spatial autocorrelation in genetic  
 526 relatedness, where black solid lines are the LOESS fit to the observed relatedness, and gray  
 527 shaded regions are 95% confidence bounds around the null expectation (black dotted lines).  
 528 Genetic diversity measures for each genetic cluster are shown in the upper tables. Sample  
 529 sizes (*N*) are followed by mean expected heterozygosity (*H<sub>E</sub>*) and mean inbreeding coefficient  
 530 (*F*), and values represent 95% confidence intervals.

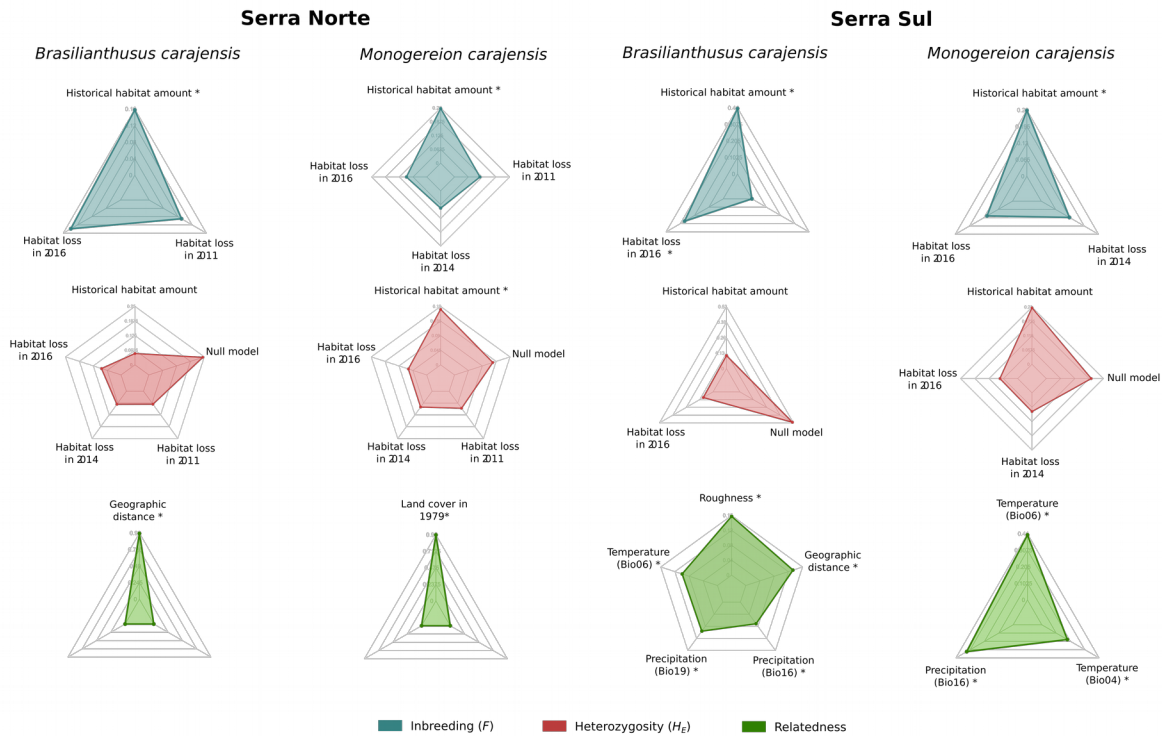

531 **Fig. 3.** Relative variable importance in the set of best-fitting models ( $\Delta AIC \leq 2$ ) for  
 532 *Brasilianthus carajensis* and *Monogereion carajensis* in Serra Norte and Serra Sul (see  
 533 methods and Supplementary Tables S1 and S4 for details). Individual-level genetic diversity  
 534 metrics ( $H_E$  and  $F$ ) were response variables and habitat amount in 1979 and habitat loss in  
 535 2011, 2014 and 2016 were predictors in genetic diversity models. Pairwise inter-individual  
 536 genetic relatedness was the response variable and resistance distances computed from  
 537 optimized surfaces were predictors in IBR models. Likelihood Ratio Test (LRT) were  
 538 performed to assess if each predictor variable significantly improved the model's log-  
 539 likelihood (significance levels are highlighted with: \* $p < 0.05$ ; \*\* $p < 0.01$ ; and \*\*\* $p <$   
 540 0.001).

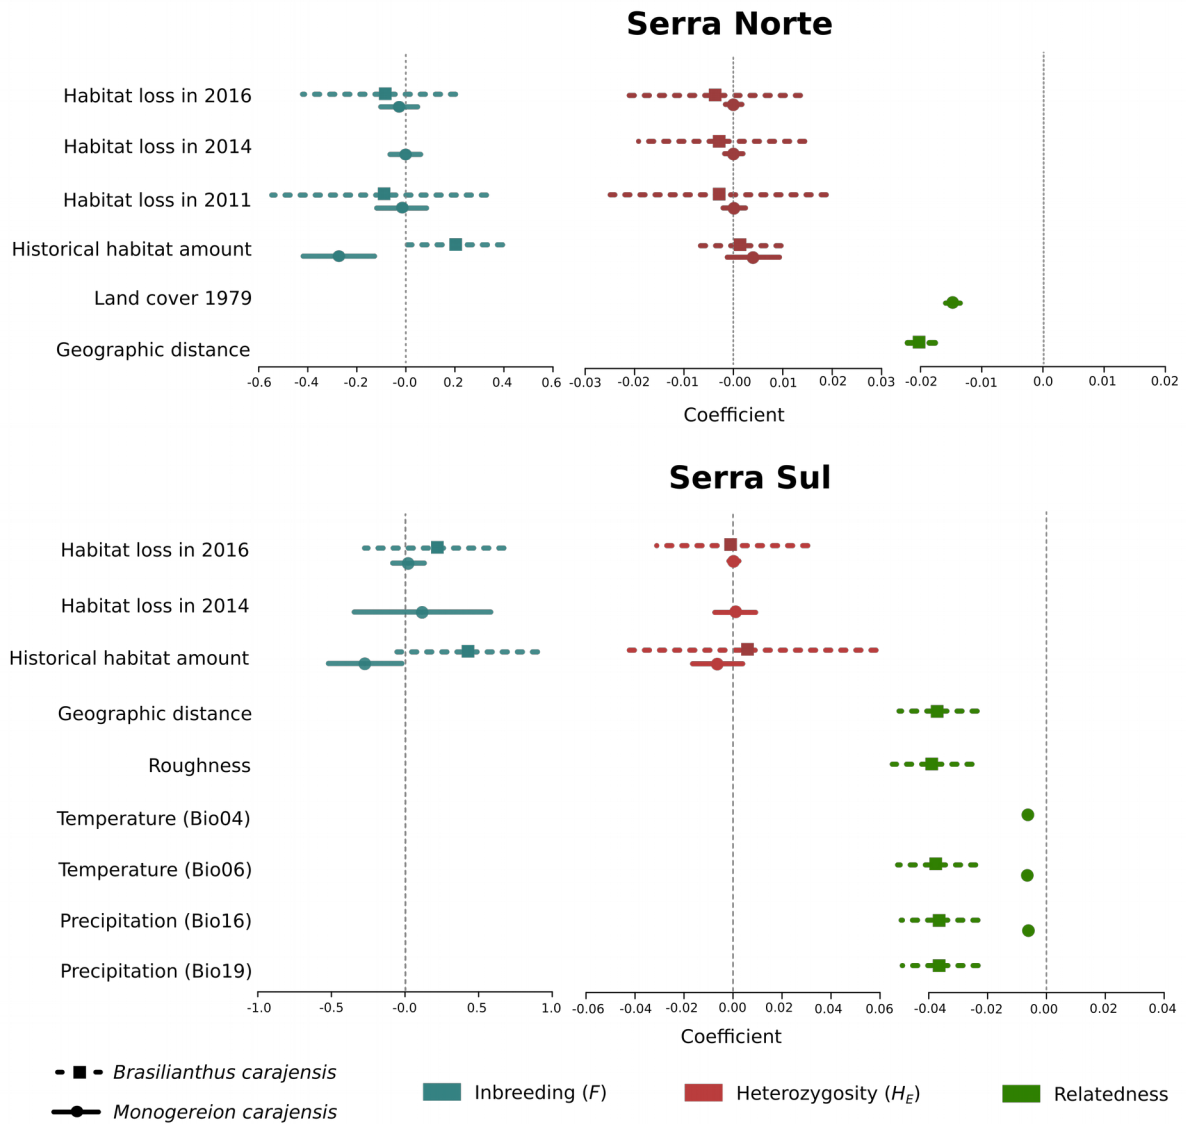

541 **Fig. 4.** Coefficient plots for the set of best-fitting models ( $\Delta AIC \leq 2$ ) for *Brasilianthus*  
542 *carajensis* and *Monogereion carajensis* in Serra Norte and Serra Sul (see methods and  
543 Supplementary Tables S2 and S5 for details). Points represent model-averaged regression  
544 coefficients and lines the 95% confidence intervals.
